# Supplementary material for: Why are animal source foods rarely consumed by 6-23 months old children in rural communities of Northern Ethiopia? A qualitative study
Source: PubMed Central journal article supplement (PMC6948827; doi:10.1371/journal.pone.0225707), 2020-01-08
Supplement: pone.0225707.s001.pdf [file pone.0225707.s001.pdf]

---

| S/N | Questions                                                                                                                                              |
|-----|--------------------------------------------------------------------------------------------------------------------------------------------------------|
| 1   | What are the common livelihoods of the people here?                                                                                                    |
| 2   | What are the major foods produced in this area, and for what purpose?                                                                                  |
| 3   | What are the common nutrition problems in the community among 6-23 months old children?                                                                |
| 4   | Can we now discuss the complementary foods that are usually considered healthy nutritious foods given to infants and young children in this community? |
| 5   | How do you evaluate the consumption level of animal source foods (ASFs) among 6-23 months old children in this community?                              |
| 6   | In your opinion, how should 6-23 months old children is fed ASFs?                                                                                      |
| 7   | Which ASFs do you consider the most nutritious food for your child? Why?                                                                               |
| 8   | How do you get ASFs for your children of 6-23 months old?                                                                                              |
| 9   | What are the barriers to access and utilization of ASFs among 6-23 months old children?                                                                |
| 10  | What could be the possible facilitators in delivering ASFs to children in this community?                                                              |
| 11  | What are the successful strategies that promote ASFs consumption to children in this community?                                                        |
| 12  | Which animal types provide more ASFs to the household?                                                                                                 |
| 13  | What are the main incomes of livestock in this community?                                                                                              |
| 14  | Do you purchase or sell animal and ASFs from/to market? If yes which ASFs and if no why?                                                               |
| 15  | How do you evaluate the price and availability of animal and ASFs in the market?                                                                       |
| 16  | Which animal and ASFs are high/less price in the market? Why?                                                                                          |

---

---

17 What is the collaboration status between agriculture and health sectors in promoting ASFs consumption in children?

18 How do you learn about ASFs feeding to children?

---
