# Supplementary material for: Why are animal source foods rarely consumed by 6-23 months old children in rural communities of Northern Ethiopia? A qualitative study
Source: PubMed Central journal article supplement (PMC6948827; doi:10.1371/journal.pone.0225707), 2020-01-08
Supplement: pone.0225707.s002.pdf [file pone.0225707.s002.pdf]

---

**ተ.ቁ.****ሕቶታት**

---

- 1 መነባብሮ ሕ/ሰብ ኣብ ምንታይ ዝተመስረተ እዩ?
  - 2 ኣብ ከባቢኩም ዝምረቱ ዋና ዋና ዘራእቲ/ምግብታት ብዓይነቶምን ረብሐኦምን ታይ ይመስሉ?  
(ንውሽጢ ዓዲ ዕዳጋ፤ ንምግብ፤ ንወፃኢ ዕዳጋ ንካልኣትን)
  - 3 ኩነታት ስነ-መዓዛ ኣብ ቆልዑን እነታትን ኣብ ከባቢኩም እንታይ ይመስል?
  - 4 ናይ ስነ መዓዛ ትሕዝቶኦም ዝሓሹ እዮም ብምባል ንሕፃናትን ቆልዑን ዝዋሃቡ ዓይነት ምግብታት እንታይን እንታይን እዮም?
  - 5 ኣብዙ ከባቢ ሕፃናት (6-23 ወርሒ) ናይ እንስሳት ተዋፅኦ ኣመጋግቦኦም እንታይ ይመስል? (ከመይ ትርእዮ?)
  - 6 ናይ ናይ እንስሳት ተዋፅኦ ኣብ ምምሕደሽ ስነ-መዓዛ ቆልዑ ረብሓ ኣለዎ ኢልኩም ዶ ትኣምኑ?  
ብከመይ ቆልዕት ናይ እንስሳት ተዋፅኦ ይምገቡ?
  - 7 ንሕፃናት ኣየናይ ናይ ናይ እንስሳት ተዋፅኦ እዩ እቲ ዝሓሸ ስነ-መዓዛ ትሕዝቶኡ? ንምንታይ?
  - 8 ናይ እንስሳት ተዋፅኦ ንሕፃናት ደቁኩም ካበይ ትረኽቡ?
  - 9 ናይ እንስሳት ተዋፅኦ ምግብታት ንምርከብ ይኩን ንምጥቃም ዘለው ማሕልካታት እንታይ እንታይ እዮም?
  - 10 ናይ እንስሳት ተዋፅኦ ምግብታት ንምርከብ ይኩን ንምጥቃም ዘለው ዕዳላት ይኹን ፃዕርታት እንታይ ይመስል?
  - 11 ኣብ ሞንጎ ሕ/ሰብኩም፤ እቶም ዕውታት ዝበሃሉ ንእንስሳት ተዋፅኦ ንምጥቃም ዝሕግዙ ስራሕቲ እንታይ እንታይ እዮም?
  - 12 ኣይነኦም ዓይነት እንስሳት ዝሓሸ ናይ እንስሳት ተዋፅኦ ንስድራቤት የበርክቱ?
  - 13 ነዚ ሕ/ሰብ፤ ካብ እንስሳት ዝርከብ ዋና ዋና ረብሓን ኣታዊን እንታይ ይመስል?
  - 14 ናይ እንስሳት ተዋፅኦ ካብ ዕዳጋ ትገዝኡ ወይ ትሸጡ ዶ? እወ እንተኾይኑ መልስኩም እንታይ እንታይ ትሸጡን ትዕድጉን? ኣይፋሉን እንተኾይኑ ልምንታይ?
-

- 
- 15 ናይ እንስሳት ተዋፅኦ ምግብታት ንምርካብ ይኹን ንምጥቃም ዘለው ዕዳላትን ዋገኦምን እንታይ ይመስል?
- 16 ኣይንኡ ናይ እንስሳት ተዋፅኦ ኣብ ዕዳጋ ይተስር ወይ ይኸብር? ልምንታይ?
- 17 ናይ ሕፃናት ስነ-ጥዕዛ ንምምሕያሽ ምስ መዳርግቲ ኣካላት ብፍላይ ኣብ ሞንጎ ሕርሻን ጥዕናን ዝስርሑ ስራሕቲ ኣብ ዙርያ ናይ እንስሳት ተዋፅኦ ምጥቃም ኣብ ህፃውንቲ ቆልዑ እንታይ ይመስል?
- 18 ብዝዓባ እንስሳት ተዋፅኦ ንሕፃናት ምጥቃም ብኸመይ ንኣዳታት ይኹን ንሕ/ሰብ ይምሓላሉ?
-
